# Supplementary material
Source: PubMed Central journal article supplement (PMC2719840)
Supplement: NIHMS114968-supplement-01.pdf [file NIHMS114968-supplement-01.pdf]

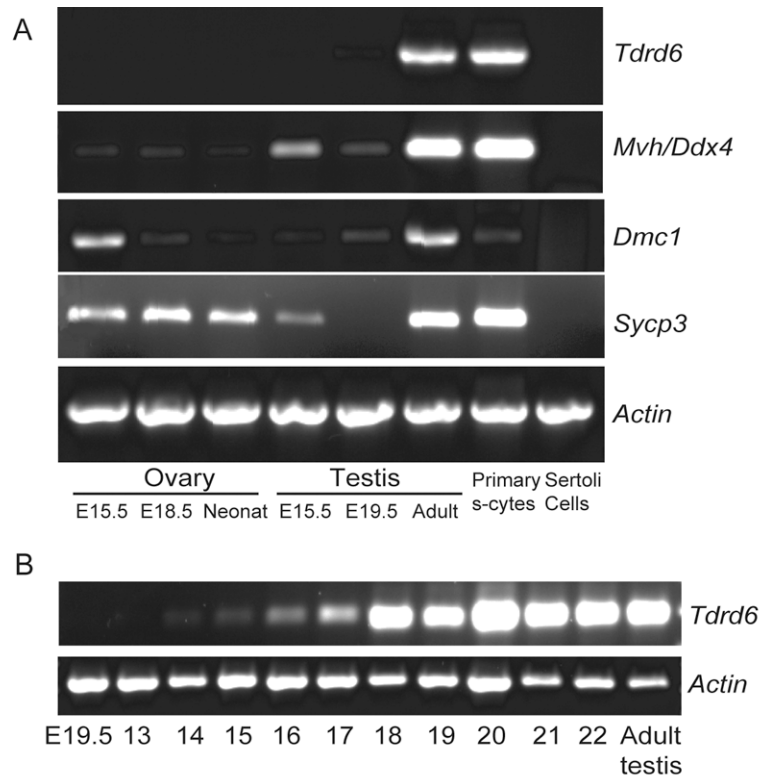

**Supplementary Fig. 1** Analysis of *Tdrd6* expression . (A) Comparison of *Tdrd6* expression and other germ cell-specific genes in male and female gonads. The label at the bottom of each lane indicates the tissue or cell type used for total RNA isolation and the age of the mouse at the time of isolation. E15.5, E18.5 and E19.5 designate embryos at 15.5, 18.5 and 19.5 days post coitum (dpc), respectively; Neonat - newborn female; Primary s-cytes - sorted primary spermatocytes (B) Time-course of *Tdrd6* mRNA expression in juvenile and adult testis assayed by RT-PCR. Beta actin was used as loading control.

Vasileva et al.

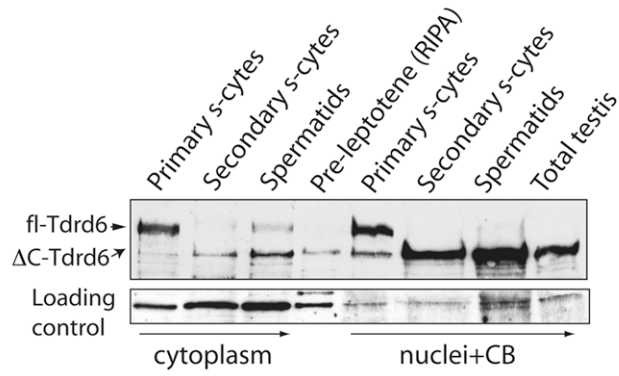

Suppl. Fig. 2 Immunoblot analysis of Tdrd6 protein expression in cytoplasmic or nuclear extract. Spermatocyte and spermatid populations from adult testis were separated by FASC sorting. Tdrd6 expression in 10 microg cytoplasmic and 5 microg nuclear extract (including CBs, which co-sediment with nuclei) was analysed with anti-265 antibody.

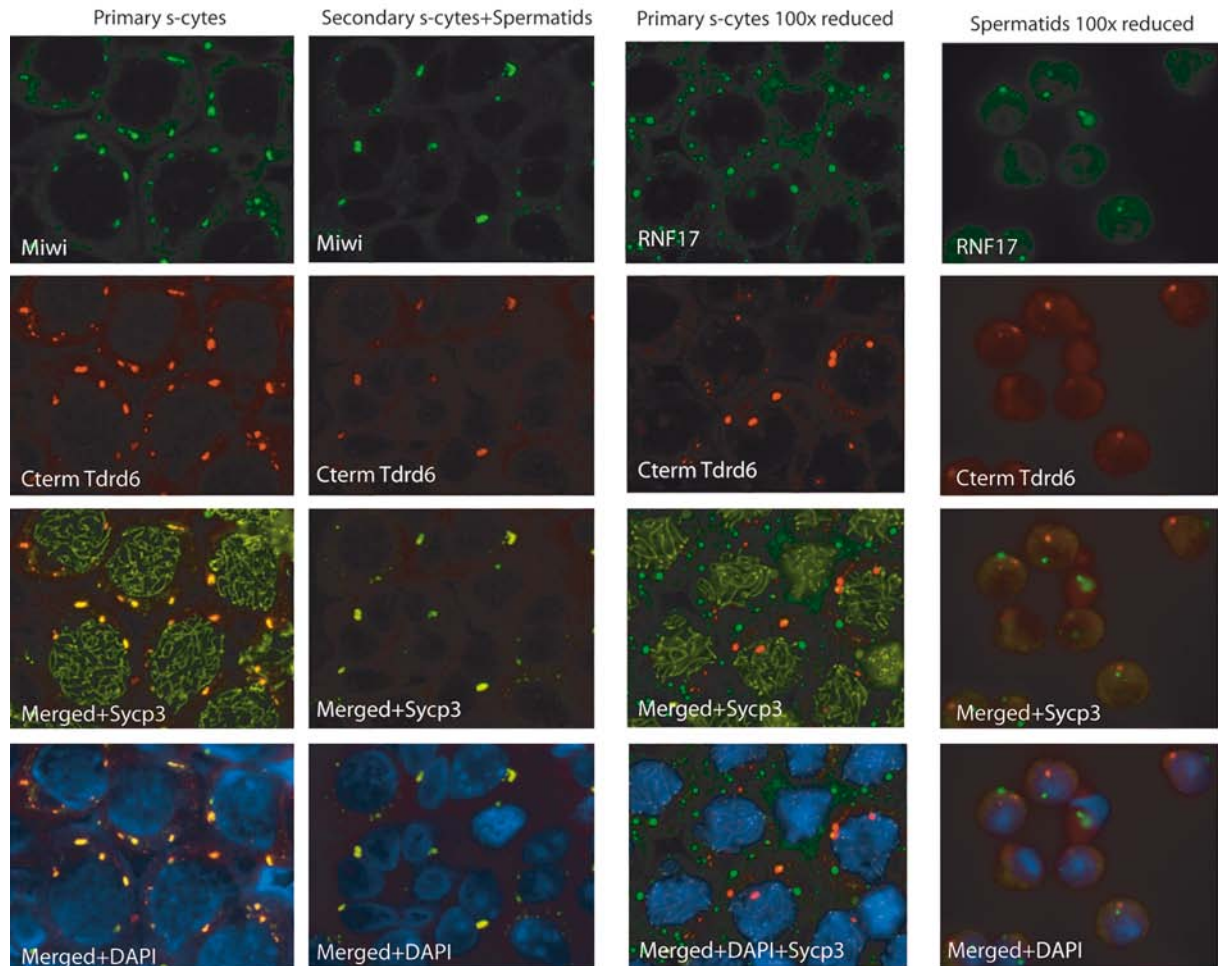

Suppl. Fig.3 Tdrd6 co-localizes with Miwi and not with RNF17 loci. Cytospun primary spermatocytes or secondary spermatocytes and spermatids were co-stained with either anti-Miwi or anti-RNF17 (green) and anti-Cterm antibodies (red). Synaptonemal complexes on chromosomes are marked with a-Sycp3 (blue) and nuclei are stained with DAPI.

Vasileva et al.

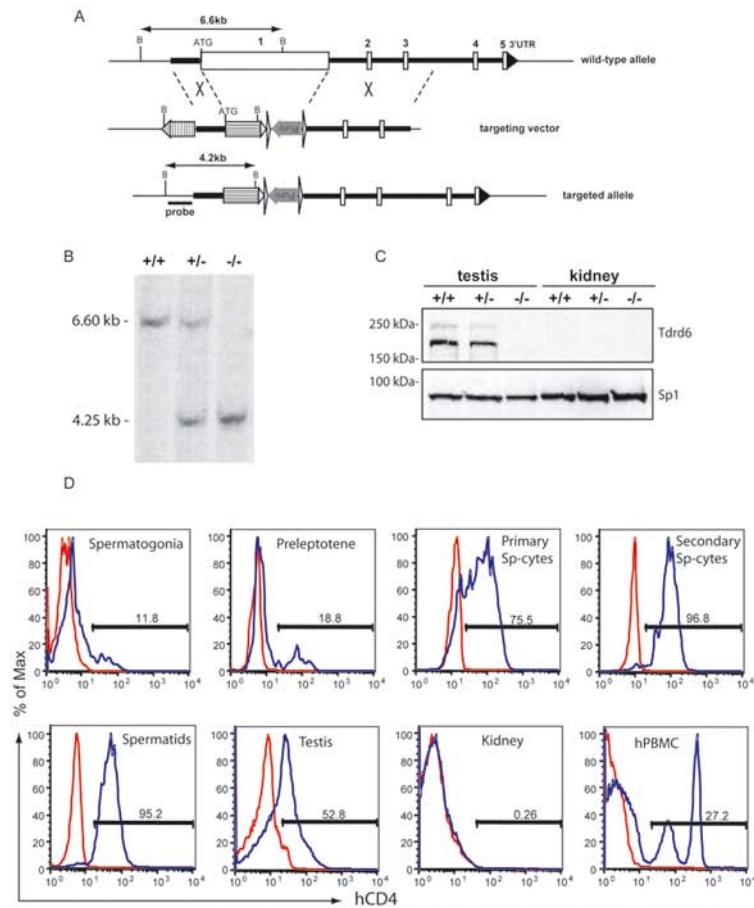

Suppl. Fig. 4. Targeted disruption of the *Tdrd6* gene and generation of *Tdrd6* null/hCD4 knock-in allele. (A) Schematic representation of the wild-type allele, the targeting vector and the mutated allele. The numbered white boxes (1-5) denote the five coding exons of the gene. The targeting vector includes the PGK-puro gene (puromycin resistance) for positive selection and the PGK-DTA (diphtheria toxin) gene for negative selection as well as the hCD4 gene in frame with the *Tdrd6* 5'UTR and ATG (start) codon. (B) Southern blot analysis of representative offspring from heterozygous mating. The wild-type allele produces a 6.6 kb BglII product, while the disrupted allele gives rise to a 4.25 kb band with a 1.4 kb 5'-end hybridization probe. (C) Western blot analysis of the *Tdrd6* in testes of the same offspring using antibodies against the N-terminus of *Tdrd6*. Lysates (10 mg of protein per lane) of the testes or kidney were loaded on the gel. The +/+, +/- and -/- indicate wildtype, heterozygous and homozygous mutant testes or kidney, respectively. Sp1 was used as loading control. (D) FACS analysis of anti-hCD4 stained total testis cell suspension and sorted germ cell subpopulations from *Tdrd6*<sup>+/+</sup> mice. Kidney cell suspension and human peripheral blood monocytes (hPBMC), which normally express CD4, were used as controls.

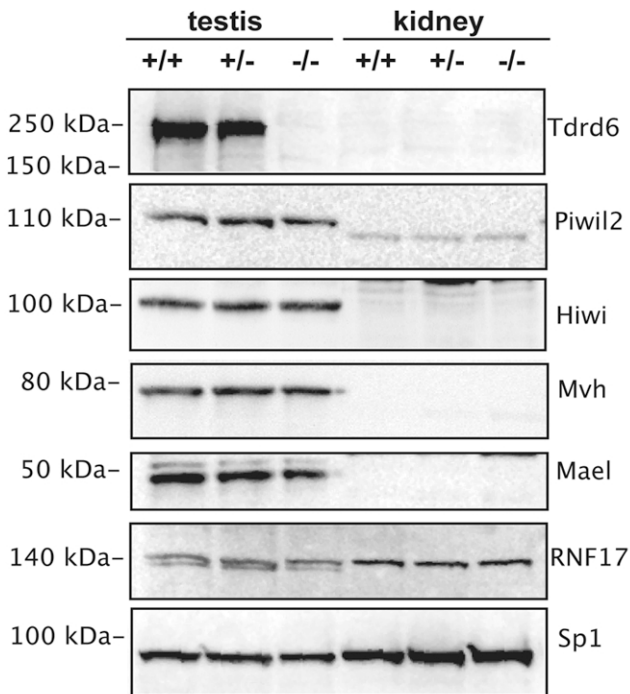

Suppl. Fig. 5. Immunoblot of nuclear extracts from testis and kidney from Tdrd6<sup>+/+</sup>, Tdrd6<sup>+/-</sup> and Tdrd6<sup>-/-</sup> mice. Extracts were probed with specific antibodies for chromatoid body markers Tdrd6, PiwiL2, Mvh, Mael, Hiwi, and for control Rnf17 and Sp1.

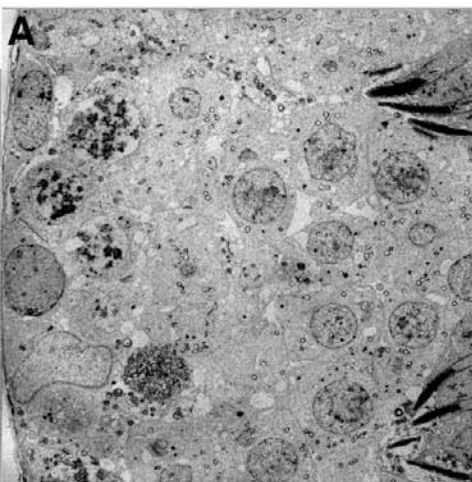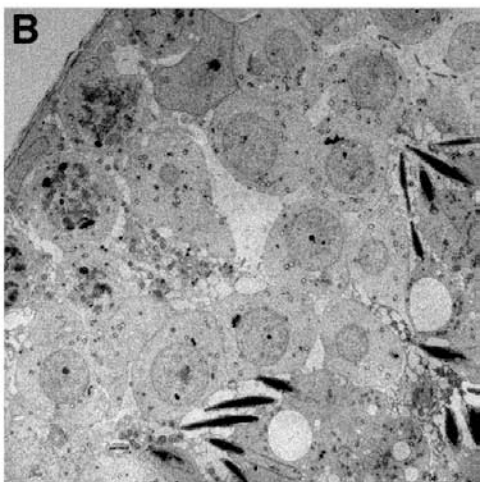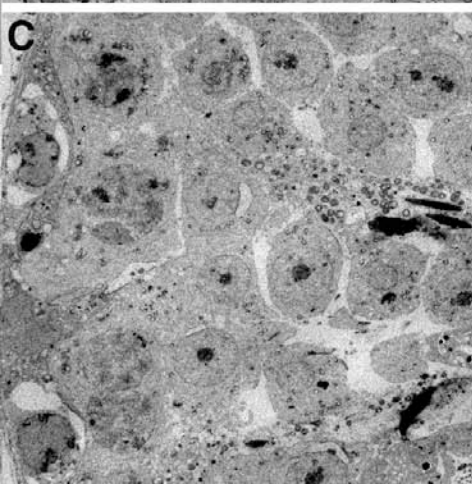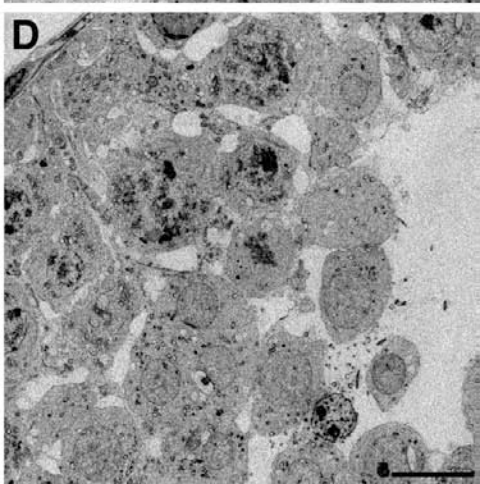

Suppl. Fig. 6. Electron microscopy of seminiferous tubules. In stage I seminiferous tubules of *Tdrd6*<sup>+/-</sup> (A) and *Tdrd6*<sup>-/-</sup> mice (B) elongated spermatids are apparent. Due to a block in spermiogenesis, stage V seminiferous tubules of *Tdrd6*<sup>-/-</sup> mice (D) lack elongated spermatids, while they are present in *Tdrd6*<sup>+/-</sup> mice (C) (bar 10  $\mu$ m).

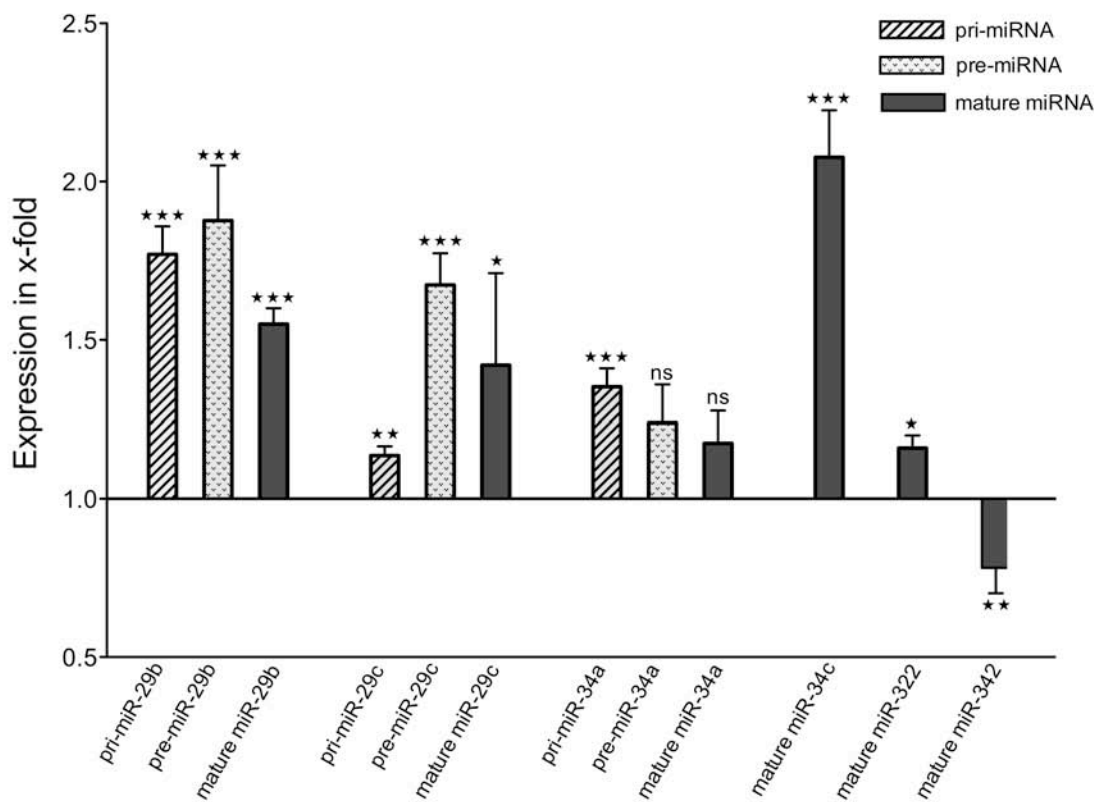

**Supplemental Figure 7 Differentially expressed precursor and mature miRNAs in testes of *Tdrd6*<sup>-/-</sup> mice.**

Analysis was performed with total testis RNA from 18 days old *Tdrd6*<sup>-/-</sup> and *Tdrd6*<sup>+/-</sup> mice. Precursors (Pri- and pre-miRNAs) were analyzed for miR-29b, miR-29c and miR-34a. Mature miRNAs were analyzed using primer for miR-29b, miR-29c, miR-34a, miR-34c, miR-322 and miR-342. The values for the *Tdrd6*<sup>+/-</sup> control were set to 1.0 and the respective increase or decrease in *Tdrd6*<sup>-/-</sup> mice are represented as mean  $\pm$  SEM. (\*\*\*) P value < 0.001, \*\* P value 0.001 to 0.01, \* P value 0.01 to 0.05, ns not significant P value > 0.05)

**Supplemental Table 1: PCR primer used in this study**

|                              |                                                         |
|------------------------------|---------------------------------------------------------|
| ShArm forward                | 5'- GAATTCTTCAAGGATAAGCTCAACGTGGAGAA                    |
| ShArm Reverse                | 5'- CGCCAACCGAGAGCT                                     |
| LongArm forward              | 5'- GAAAATTTAAATACAAAGAAGTTAGCTCAGATTTG                 |
| LongArm reverse              | 5'- CAGTTTAAACGCTAACATGCTAACACTA                        |
| hCD4 reverse                 | 5'- GGGAAGCTGTACAGGTCAGTTCCA                            |
| Tdrd6ShArmgeno forward       | 5'- GGCTGCTACCAGTCGCGAGTC                               |
| Tdrd6genoWT reverse          | 5'- ATGGAGGAGCAACACATCCAGGAC                            |
| + Tdrd6 RT-fwd               | 5'- GAAGGAAGGAAGTGCGGGAGC                               |
| Tdrd6 RT-rev                 | 5'- CACCTCCACACGCCTCCTCC                                |
| Cterm-fwd BgIII              | 5'- GCCAGAtctGGAAGGAAGTGCG                              |
| C-term-revXhoI               | 5'- ATGCTCGAGTCATATGTTTCAGC                             |
| Nterm-fwdBgIII               | 5'-TCGAGATCTACTCCGGGGCTGC                               |
| Nterm-revXhoI                | 5'-CCTCGAGGGGCAGGTGGAAGA                                |
| Actin-F (qRT-PCR)            | 5'- AGGCATTGCTGACAGGATGCAG                              |
| Actin-R (qRT-PCR)            | 5'- AGCACTTGCGGTGCACGATG                                |
| GAPDH-F (qRT-PCR)            | 5'- GAGAAACCTGCCAAGTATGATG                              |
| GAPDH-R (qRT-PCR)            | 5'- GGAGTTGCTGTTGAAGTCGC                                |
| MP-F (miR-qRT-PCR)           | 5'- TGTCAGGCAACCGTATTCACC                               |
| MP-R (miR-qRT-PCR)           | 5'- CGTCAGATGTCCGAGTAGAGG                               |
| 5S rRNA-F (miR-qRT-PCR)      | 5'- GCCCGATCTCGTCTGATCT                                 |
| 5S rRNA-R (miR-qRT-PCR)      | 5'- AGCCTACAGCACCCGGTATT                                |
| RT-miR-29b-1(miR-qRT-PCR)    | 5'- TGTCAGGCAACCGTATTCACCGTGAGTGGTAACT                  |
| RT-miR-29c(miR-qRT-PCR)      | 5'- TGTCAGGCAACCGTATTCACCGTGAGTGGTTAACCG                |
| RT-miR-34a(miR-qRT-PCR)      | 5'- TGTCAGGCAACCGTATTCACCGTGAGTGGTACAACC                |
| RT-miR-34c(miR-qRT-PCR)      | 5'- TGTCAGGCAACCGTATTCACCGTGAGTGGTCCTGGC                |
| RT-miR-322(miR-qRT-PCR)      | 5'- TGTCAGGCAACCGTATTCACCGTGAGTGGTTCCAAA                |
| RT-miR-342(miR-qRT-PCR)      | 5'- TGTCAGGCAACCGTATTCACCGTGAGTGGTCCTGGC                |
| Short-miR-29b1R(miR-qRT-PCR) | 5'- CGTCAGATGTCCGAGTAGAGGGGGAAACGGCGTAGCACCATTTGAAATCAG |
| Short-miR-29c-R(miR-qRT-PCR) | 5'- CGTCAGATGTCCGAGTAGAGGGGGAAACGGCGTAGCACCATTTGAAATCGG |
| Short-miR-34a-R(miR-qRT-PCR) | 5'- CGTCAGATGTCCGAGTAGAGGGGGAAACGGCGTGGCAGTGTCTTAGCTCC  |
| Short-miR-34c-R(miR-qRT-PCR) | 5'- CGTCAGATGTCCGAGTAGAGGGGGAAACGGCGAATCACTAACCACACAGC  |
| Short-miR-322-R(miR-qRT-PCR) | 5'- CGTCAGATGTCCGAGTAGAGGGGGAAACGGCGCAGCAGCAATTCATGTTT  |
| Short-miR-342-R(miR-qRT-PCR) | 5'- CGTCAGATGTCCGAGTAGAGGGGGAAACGGCGAGGGGTGCTATCTGTGAT  |
| Pri-miR-29b1-F(miR-qRT-PCR)  | 5'- TGTAAGCCTCGTGCTCACTG                                |
| Pri-miR-29b1-R(miR-qRT-PCR)  | 5'- GAAGGTGAAGTCCGTGCAAT                                |
| Pre-miR-29b1-F(miR-qRT-PCR)  | 5'- AGGAAGCTGGTTTCATCTGG                                |
| Pre-miR-29b1-R(miR-qRT-PCR)  | 5'- AGAACACTGATTTCAAATG                                 |
| Pri-miR-29c-F(miR-qRT-PCR)   | 5'- AGCAAGGAAGGGGTAAGAGC                                |
| Pri-miR-29c-R(miR-qRT-PCR)   | 5'- ACCGACTGGTGGTGTCTTC                                 |



|                            |                          |
|----------------------------|--------------------------|
| Pre-miR-29c-F(miR-qRT-PCR) | 5'- ATCTCTTACACAGGCTGACC |
| Pre-miR-29c-R(miR-qRT-PCR) | 5'- TCCCCCTACATCATAACCGA |
| Pri-miR-34a-F(miR-qRT-PCR) | 5'- TCCTGACTCAGCCTCCTTGT |
| Pri-miR-34a-R(miR-qRT-PCR) | 5'- TGACACACTCCTCCAGCACT |
| Pre-miR-34a-F(miR-qRT-PCR) | 5'- CCAGCTGTGAGTAATTCTTT |
| Pre-miR-34a-R(miR-qRT-PCR) | 5'- ACAATGTGCAGCACTTCTAG |

| Mmu-miR  | GeneID | Fold | Genomic Locus              | Mmu-miR- Cluster                                                                                                                                                                                                          | features                   | IG/IT              |
|----------|--------|------|----------------------------|---------------------------------------------------------------------------------------------------------------------------------------------------------------------------------------------------------------------------|----------------------------|--------------------|
| -29c     | 39300  | 4,3  | 1:196,863,234-196,863,828  | -29b-2, -29c                                                                                                                                                                                                              |                            | IG                 |
| -30a*    | 39306  | 2,7  | 1:123,279,108-23,279,178   |                                                                                                                                                                                                                           |                            | IG                 |
| -128     | 39210  | 1,8  | 1:130,098,938-130,099,007  |                                                                                                                                                                                                                           |                            | IT                 |
| -466a-3P | 38815  | 1,9  | 2: 10,388,571-10,438,791   | -466a, -466b, -4667a, -669, -297a, -297c, -466b-1, -466d                                                                                                                                                                  |                            | IT                 |
| -466a-5P | 35833  | 4,1  |                            |                                                                                                                                                                                                                           |                            | IT                 |
| -466b-3P | 39949  | 2,3  |                            |                                                                                                                                                                                                                           |                            | IT                 |
| -466b-5P | 38810  | 1,7  |                            |                                                                                                                                                                                                                           |                            | IT                 |
| -467a    | 38825  | 1,6  |                            |                                                                                                                                                                                                                           |                            | IT                 |
| -200a    | 38505  | 2,5  |                            |                                                                                                                                                                                                                           | 4:155,428,014-155,429,859  | -200a, -200b, -429 |
| -200b    | 38723  | 2,5  |                            | IT                                                                                                                                                                                                                        |                            |                    |
| -30e*    | 39308  | 3,1  | 4:120,442,139-120,445,302  | -30c-, 30e                                                                                                                                                                                                                |                            | IT                 |
| -34a*    | 39306  | 1,3  | 4:149,442,563-149,442,664  |                                                                                                                                                                                                                           |                            | IG                 |
| -339-5P  | 39327  | 2,1  | 5:139,845,604-139,845,699  |                                                                                                                                                                                                                           |                            | IT                 |
| -29b-1   | 38569  | 1,9  | 6: 31,012,660-31,013,093   | -29a, -29b-1                                                                                                                                                                                                              | CpG,TSS                    | IT                 |
| -489     | 38535  | 2,4  | 6: 3,671,301-3,672,003     | -489, -653                                                                                                                                                                                                                |                            | IG                 |
| -148a    | 35857  | 1,9  | 6: 51,219,811-51,219,909   |                                                                                                                                                                                                                           | CpG,TSS                    | IG                 |
| -202     | 38506  | 2,8  | 7:147,143,588-147,143,659  |                                                                                                                                                                                                                           | TSS                        | IG                 |
| -140     | 35847  | 2,4  | 8:110,075,144-110,075,213  |                                                                                                                                                                                                                           |                            | IT                 |
| -191     | 39255  | 0,7  | 9:108,470,650-108,471,192  | -191, 425                                                                                                                                                                                                                 | CpG                        | IG                 |
| -34c*    | 39350  | 1,8  | 9: 50,911,139-50,911,750   | -34a, -34c                                                                                                                                                                                                                | CpG,TSS                    | IG                 |
| -125b    | 35830  | 0,7  | 9: 41,390,009-41,390,085   |                                                                                                                                                                                                                           | TSS                        | IT                 |
| -451     | 39370  | 1,6  | 11: 77,886,507-77,886,743  | -144, -451                                                                                                                                                                                                                |                            | IG                 |
| -497     | 35866  | 3,0  | 11: 70,048,219-70,048,637  | -195, -497                                                                                                                                                                                                                |                            | IG                 |
| -21      | 35883  | 2,3  | 11: 86,397,569-86,397,660  |                                                                                                                                                                                                                           |                            | IT                 |
| -152     | 35861  | 2,0  | 11: 96,711,707-96,711,779  |                                                                                                                                                                                                                           | CpG,TSS                    | IT                 |
| -301a    | 38983  | 1,6  | 11: 86,926,506-86,926,591  |                                                                                                                                                                                                                           | CpG,TSS                    | IT                 |
| -379     | 38528  | 2,0  | 12:110,947,270-110,982,005 | -134, -154, -299, -300, -323, -329, -369, -377, -376a, -376b, -376c, -379, -380, -381, -382, -409, -410, -411 -412, -453, -476, -485, -487b, -494, -495, -496, -539, -541, -543, -544, -654, -666, -667, -668, -679, -758 |                            | IG                 |
| -487b    | 38377  | 1,8  |                            |                                                                                                                                                                                                                           |                            | IG                 |
| -494     | 39394  | 2,5  |                            |                                                                                                                                                                                                                           |                            | IG                 |
| -203     | 38328  | 2,1  |                            |                                                                                                                                                                                                                           | 12:113,369,091-113,369,166 |                    |
| -342-3P  | 38991  | 0,6  | 12:109,896,830-109,896,928 |                                                                                                                                                                                                                           |                            | IT                 |
| -7a      | 38644  | 2,8  | 13: 58,494,140-58,494,247  |                                                                                                                                                                                                                           |                            | IG                 |
| -15a     | 35864  | 1,8  | 14: 62,250,717-62,250,947  | -15a, -16-1                                                                                                                                                                                                               |                            | IG                 |
| -17*     | 38715  | 1,9  | 14:115,442,893-115,443,728 | -17, -18a, -19a, -19b-1, -20a, -92a-1                                                                                                                                                                                     | CpG,TSS                    | IG                 |
| -19a     | 38326  | 2,1  |                            |                                                                                                                                                                                                                           | CpG,TSS                    | IG                 |
| -125a    | 39208  | 0,6  | 17: 17,967,152-17,967,843  | Let-7e, -99b, -125a                                                                                                                                                                                                       | TSS                        | IG                 |
| -204     | 38727  | 0,7  | 19: 22,825,095-22,825,162  |                                                                                                                                                                                                                           |                            | IT                 |
| -101b    | 38961  | 2,8  | 19: 29,209,769-29,209,865  |                                                                                                                                                                                                                           |                            | IT                 |
| -362-3P  | 38773  | 2,5  | X: 6,814,809-6,825,623     | -188, -362, -500, -501, -532                                                                                                                                                                                              |                            | IT                 |
| -18b     | 38720  | 1,7  | X: 50,094,870-50,095,744   | -18, -19b, -20b, 92a, -106a, -363                                                                                                                                                                                         | TSS                        | IG                 |
| -20b     | 38708  | 2,2  |                            |                                                                                                                                                                                                                           | TSS                        | IG                 |
| -106a    | 38708  | 1,5  |                            |                                                                                                                                                                                                                           | TSS                        | IG                 |
| -201     | 38725  | 2,2  | X: 65,241,271-65,241,626   | -201, -547                                                                                                                                                                                                                |                            | IG                 |
| -322     | 35904  | 1,7  | X: 50,401,174-50,407,526   | -322, -351, -450a, -450b, -503, -542                                                                                                                                                                                      | CpG,TSS                    | IG                 |
| -351     | 38995  | 2,7  | X: 64,029,932-63,067,200   | -463, -470, -471, -472, -473a, -473b, -880, -881, -883a, -883b, -871, -878, -889                                                                                                                                          | CpG,TSS                    | IG                 |
| -503     | 38849  | 2,2  |                            |                                                                                                                                                                                                                           | CpG,TSS                    | IG                 |
| -463     | 38807  | 2,9  |                            |                                                                                                                                                                                                                           | IG                         |                    |
| -470     | 38833  | 1,5  |                            |                                                                                                                                                                                                                           | IG                         |                    |

|          |       |     |                           |                                           |    |
|----------|-------|-----|---------------------------|-------------------------------------------|----|
| -471     | 38834 | 3,3 |                           |                                           | IG |
| -472     | 38683 | 3,7 |                           |                                           | IG |
| -878-5P  | 38687 | 2,0 |                           |                                           | IG |
| -881*    | 40027 | 2,3 |                           |                                           | IG |
| -743b-3P | 38681 | 2,1 |                           |                                           | IG |
| -883a-5P | 40153 | 3,4 |                           |                                           | IG |
| -883b-3P | 38698 | 1,8 |                           |                                           | IG |
| -465a-5P | 38533 | 4,1 | X: 64,079,130-64,092,300  | -465a, -465b-1, -465b-2, -465c-1, -465c-2 | IG |
| -465b-5P | 38810 | 1,7 |                           |                                           | IG |
| -361     | 35910 | 1,5 | X:110,188,433-110,188,502 |                                           | IT |
| -805     | 39885 | 2,0 | MT:16,115-16,209          |                                           | IG |

### Supplemental Table 2

**Differentially expressed miRNAs in testes of 18 days old *Tdrd6*<sup>-/-</sup> mice.** The genomic loci and feature sets used to annotate miRNAs are available through the miRBase database (<http://microrna.sanger.ac.uk>). \* indicates minor miR\* sequences; IG: intragenic; IT: intergenic.

## Supplemental Experimental Procedures

### Generation and genotyping of *Tdrd6* deficient mice

To generate the *Tdrd6*<sup>null</sup> allele we disrupted the first of the five exons (Chromosome 17; ENSEMBLE gene ID ENSMUSG00000040140), which contains 95% of the *Tdrd6* cDNA sequence. Homologous genome sequences amplified by PCR (Table S1) were cloned into the targeting vector pTV-Uni [1]: The final targeting vector consisted of: (i) the Diphtheria toxin A gene for negative selection; (ii) a 5' arm of homology encompassing 1.4 kb upstream of the start codon; (iii) a truncated human CD4 cDNA; (iv) a synthetic intron and bovine growth hormone polyadenylation sequence; (v) a loxP flanked puromycin resistance gene; and (vi) a "long arm" of homology of 5 kb downstream of downstream of exon 1 of the *Tdrd6* locus. The linearized targeting vector was electroporated into R1 W4/129S6 embryonic stem (ES) cells (Taconic Inc.). ES cell clones that survived puromycin selection were analyzed by PCR and the absence of random integration was confirmed by Southern Blotting. One positive clone was injected into a C57BL/6 blastocyst and the resulting chimeras were crossed with C56BL/6 mice and transmitted the mutant allele through the germline. Genomic DNA from the progeny was analyzed by PCR (primers see Table S1) and by Southern Blotting according to standard procedures [2]. Briefly, tail DNA was isolated, digested with *Bgl*III, separated by agarose gel electrophoresis and transferred to Hybond-N<sup>+</sup> nylon (Amersham) membrane. The DNA was crosslinked to the membrane with UV light and hybridized with 1.4kb fragment of  $\alpha$ -<sup>32</sup>P-dCTP-labeled probe prepared from a region 200 bp upstream of the *Tdrd6* start codon. Homozygous mice were obtained by crossing heterozygous males to either heterozygous females or homozygous females. The mouse colony is maintained in a mixed genetic background of 129 and C57BL/6.

### Histological analysis, TdT-mediated dUTP nick end labeling (TUNEL) assay.

Testes were dissected, weighed, fixed in either Bouin's solution (Sigma) or 3.7% paraformaldehyde overnight at 4°C, and cut into 6  $\mu$ m paraffin sections. Periodic acid-Schiff (PAS) was used for histological analysis on paraffin sections according to standard

protocols. Apoptosis was analyzed by TUNEL labeling using the TACS 2 TdT-DAB kit (Trevigon Inc.).

### **Northern analysis, RT-PCR and qPCR**

Testes were collected at the indicated mouse age and RNA was isolated using an RNAeasy kit (Qiagen Inc., Valencia, CA) or for qPCR extracted with Trizol reagent (Invitrogen). RNA preparations were treated with DNase (Promega) for 30 minutes at 37°C. RNA isolated from adult *Smc1 $\beta$* <sup>-/-</sup> mice or from cultured Sertoli cells was used as control. Northern blots were performed by standard techniques [3]. Probes hybridizing to *Smc1 $\beta$*  and *L32* mRNA were isolated as previously described [4]. A 400bp fragment of *Tdrd6* produced by PCR from pcDNA3.1-3xHA-*Tdrd6* (see TnT section) with primers *Tdrd6*-RT-fwd and *Tdrd6*-RT-rev (Table S1) was used as a template for generating randomly  $\alpha$ [<sup>32</sup>P]-dCTP-labeled probe against this sequence, using the Stratagene PrimeIt DNA labelling kit. Radiolabelled probes were purified using prepacked Sephadex G50 columns (NICK columns, Amersham). Northern hybridization signals were acquired on PhosphorImager (Molecular Dynamics, Sunnyvale, CA). RT-PCR reactions were performed with the One-Step Kit from Qiagen according to the manufacturer's recommendations. For primer sequences refer to Table S2.

Total cDNA was prepared from 1  $\mu$ g of RNA using SuperScript II Reverse Transcriptase (Invitrogen). For real-time qPCR reactions poly-dT primers (Roche) were used. Quantitative PCR was carried out using QuantiTect SYBR Green PCR Kit from Qiagen. Actin and GAPDH were used for normalization. Primers for qPCR were used as described [5] and are listed in Table S1.

### **Southern Blot analyses of retrotransposon gene methylation**

Five  $\mu$ g genomic DNA were digested over night at 37° C with either *Msp*I or *Hpa*II restriction enzymes (NEB Inc.). The digested DNA was subjected to 1% agarose gel electrophoresis, and was then transferred to an Hybond-N+ charged nylon membrane (Amersham). The L1 probe corresponded to nucleotides 515–1,628 of the L1 sequence (GenBank accession no. M13002) [6]. The probe was random-prime labeled with <sup>32</sup>P-dCTP using Prime-It RmT Random Primer Labeling Kit (Stratagene).

Hybridizations were carried out overnight at 65°C.

### **Sucrose cushion centrifugation**

Decapsulated testes from adult C57BL/6 mice were Dounce-homogenized in 10 mM Hepes, pH 7.6, 25 mM KCl, 0.15 mM spermine, 0.5 mM spermidine, 1 mM EDTA, 2 M sucrose and 10 % glycerol. The homogenate was diluted with homogenization buffer and the sample layered over a cushion of the same buffer of one third of the sample volume, as described in [7]. Samples were centrifuged for 30 min at 25,000 x g in an SW55 rotor (Beckman, Mountain View, CA). Fractions were collected manually starting from the top of the gradient. The pellet containing nuclei was resuspended in a 9:1 (v/v) mixture of homogenization buffer and glycerol, homogenized with a Teflon pestel in a Dounce homogenizer and centrifuged under the same conditions to obtain pure nuclei.

Five percent of each fraction was loaded for immunoblot.

1. Gadue, P., Huber, T.L., Paddison, P.J., and Keller, G.M. (2006). Wnt and TGF-beta signaling are required for the induction of an in vitro model of primitive streak formation using embryonic stem cells. *Proc Natl Acad Sci U S A* *103*, 16806-16811.
2. Sambrook, J., and Russell, D.W. (2001). *Molecular cloning : a laboratory manual*, 3rd Edition, (Cold Spring Harbor, N.Y.: Cold Spring Harbor Laboratory Press).
3. Sambrook, J., Fritsch, E.F., and Maniatis, T. (1989). *Molecular cloning : a laboratory manual*, 2nd Edition, (Plainview, N.Y.: Cold Spring Harbor Laboratory Press).
4. Revenkova, E., Eijpe, M., Heyting, C., Gross, B., and Jessberger, R. (2001). Novel Meiosis-Specific Isoform of Mammalian SMC1. *Mol. Cell. Biol.* *21*, 6984-6998.
5. Carmell, M.A., Girard, A., van de Kant, H.J., Bourc'his, D., Bestor, T.H., de Rooij, D.G., and Hannon, G.J. (2007). MIWI2 is essential for spermatogenesis and repression of transposons in the mouse male germline. *Dev Cell* *12*, 503-514.
6. Soper, S.F., van der Heijden, G.W., Hardiman, T.C., Goodheart, M., Martin, S.L., de Boer, P., and Bortvin, A. (2008). Mouse maelstrom, a component of nuage, is essential for spermatogenesis and transposon repression in meiosis. *Dev Cell* *15*, 285-297.
7. Gorski, K., Carneiro, M., and Schibler, U. (1986). Tissue-specific in vitro transcription from the mouse albumin promoter. *Cell* *47*, 767-776.
